# Supplementary material for: Sonication-enabled rapid production of stable liquid metal nanoparticles grafted with poly(1-octadecene-alt-maleic anhydride) in aqueous solutions
Source: Royal Society of Chemistry journal article supplement (doi:10.1039/c8nr05600e), 2018-01-01
Supplement: c8nr05600e1.pdf [file c8nr05600e1.pdf]

## Electronic Supplementary Information

# Sonication-enabled Rapid Production of Stable Liquid Metal Nanoparticles Grafted with Poly(1-octadecene-*alt*-maleic anhydride) in Aqueous Solutions

Yiliang Lin<sup>a</sup>, Jan Genzer<sup>a</sup>, Weihua Li<sup>b</sup>, Ruirui Qiao<sup>c</sup>, Michael D. Dickey<sup>\*a</sup>, Shi-Yang Tang<sup>\*b</sup>

<sup>a</sup>Department of Chemical and Biomolecular Engineering, North Carolina State University, Raleigh, NC, USA.

Email: [mddickey@ncsu.edu](mailto:mddickey@ncsu.edu)

<sup>b</sup>School of Mechanical, Materials, Mechatronic and Biomedical Engineering, University of Wollongong, Australia

E-mail: [shiyang@uow.edu.au](mailto:shiyang@uow.edu.au)

<sup>c</sup>ARC Centre of Excellence in Convergent Bio-Nano Science and Technology, Drug Delivery, Disposition and Dynamics Theme, Monash Institute of Pharmaceutical Sciences, Monash University, Parkville, VIC 3052, Australia

Keywords: Liquid metal; EGeIn; Nanoparticles; Functional material; Sonication

### CEBD of the LM NPs

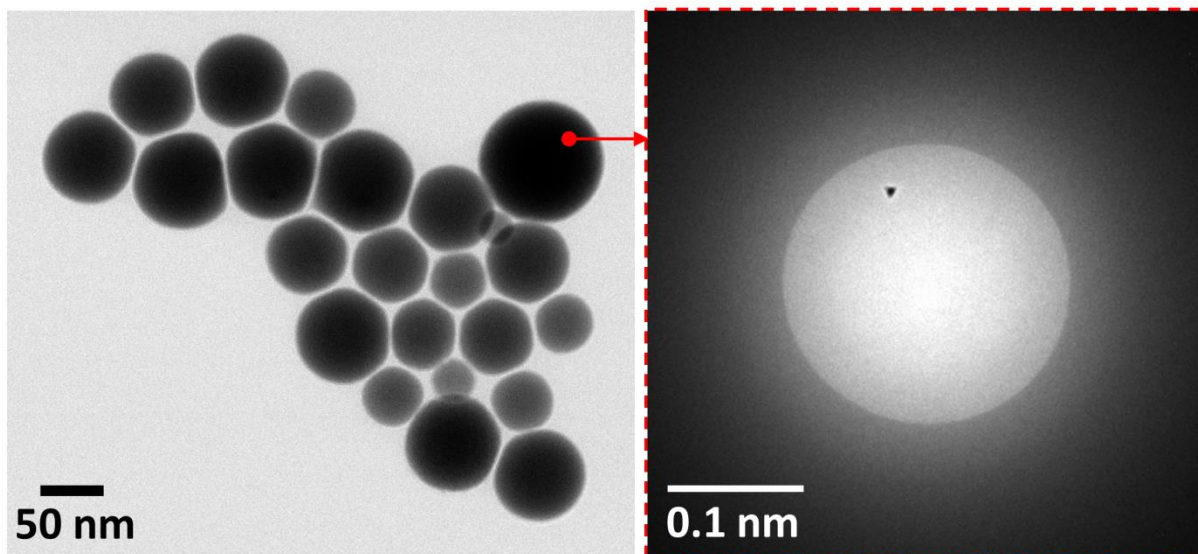

**Figure S1.** TEM and CBED images of the EGaIn NP. No diffraction pattern can be observed, indicating that NPs remains in a liquid state.

## Investigating the Thickness of the POMA Polymer Coating

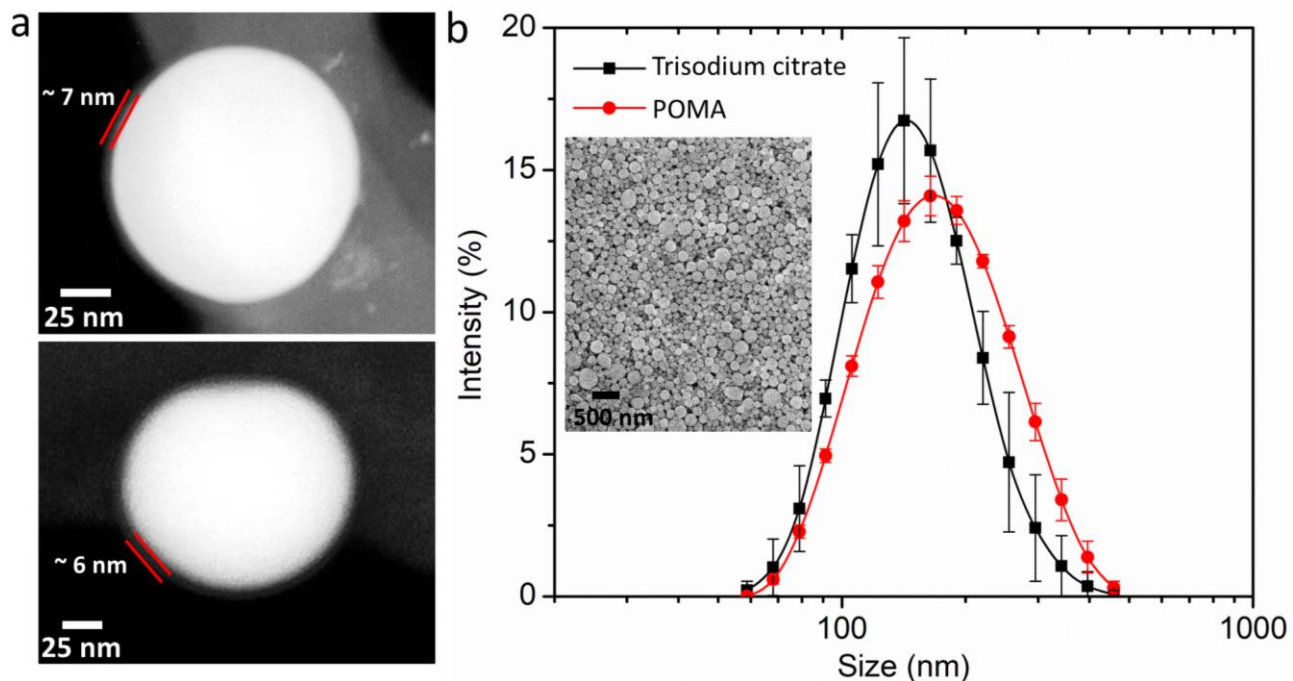

**Figure S2.** (a) Representative HAADF images of the POMA grafted LM NPs on a TEM grid coated with a lacey carbon film. (b) Hydrodynamic size distributions of the trisodium citrate and POMA coated EGaIn NPs within DI water; the inset shows the SEM image of the trisodium citrate coated LM NPs.

## Control Experiments

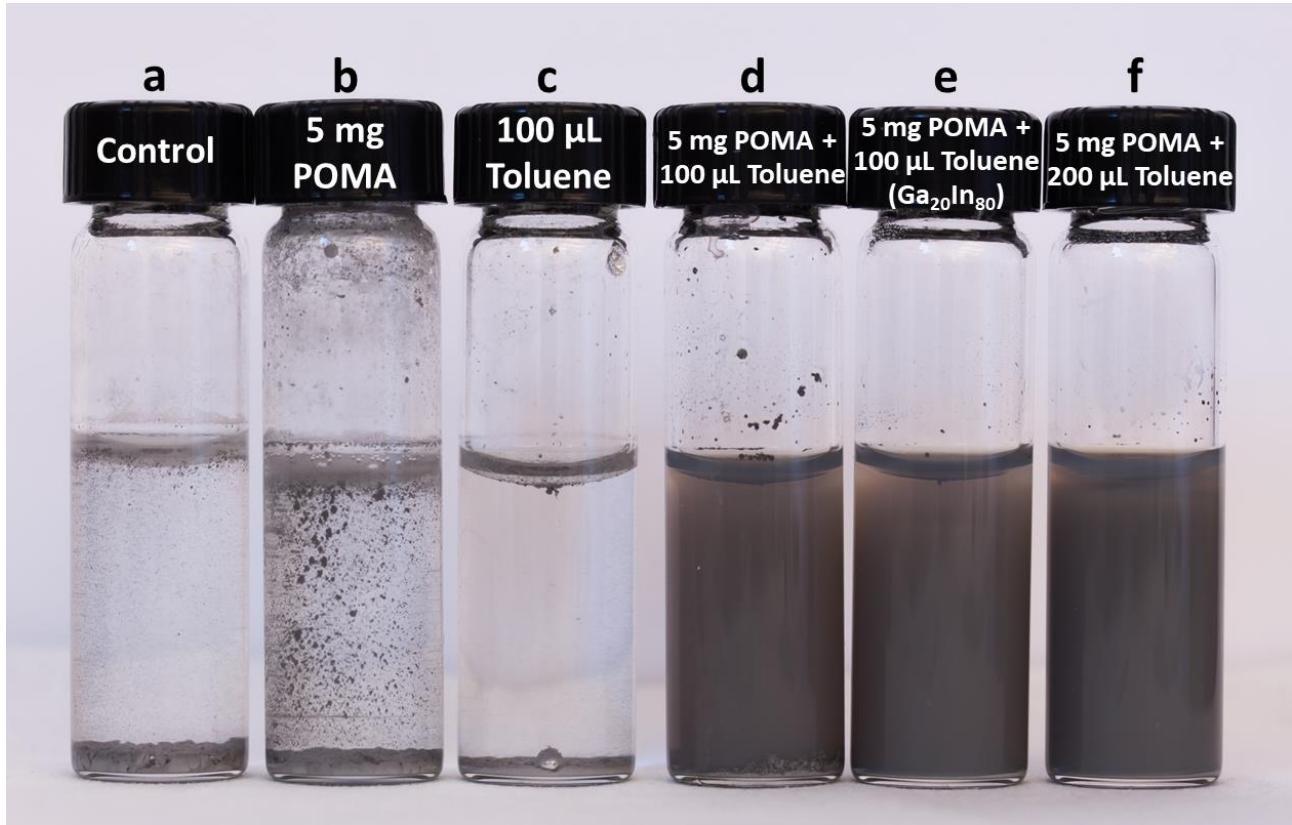

**Figure S3.** Liquid metal NP suspension 48 h after production using a) 50  $\mu\text{L}$  EGaIn + 5 mL DI water, b) 50  $\mu\text{L}$  EGaIn + 5 mL DI water + 5 mg POMA, c) 50  $\mu\text{L}$  EGaIn + 5 mL DI water + 100  $\mu\text{L}$  toluene, d) 50  $\mu\text{L}$  EGaIn + 5 mL DI water + 5mg POMA + 100  $\mu\text{L}$  Toluene, e) 50  $\mu\text{L}$  Ga<sub>20</sub>In<sub>80</sub> + 5 mL DI water + 5 mg POMA + 100  $\mu\text{L}$  Toluene, and f) 50  $\mu\text{L}$  EGaIn + 5 mL DI water + 5 mg POMA + 200  $\mu\text{L}$  Toluene.

## Brushed polyethylene glycol (bPEG) grafted EGaIn NPs

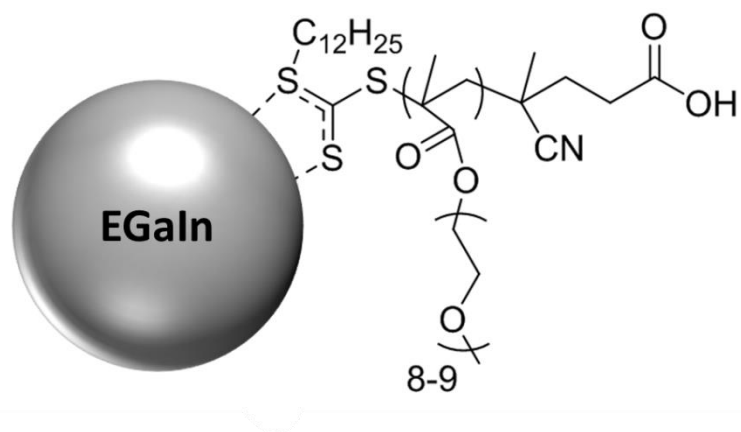

**Figure S4.** Scheme of the conjugation between bPEG molecules and EGaIn particle [1].

### EDS spectrum for PMVEMA grafted EGaIn NPs

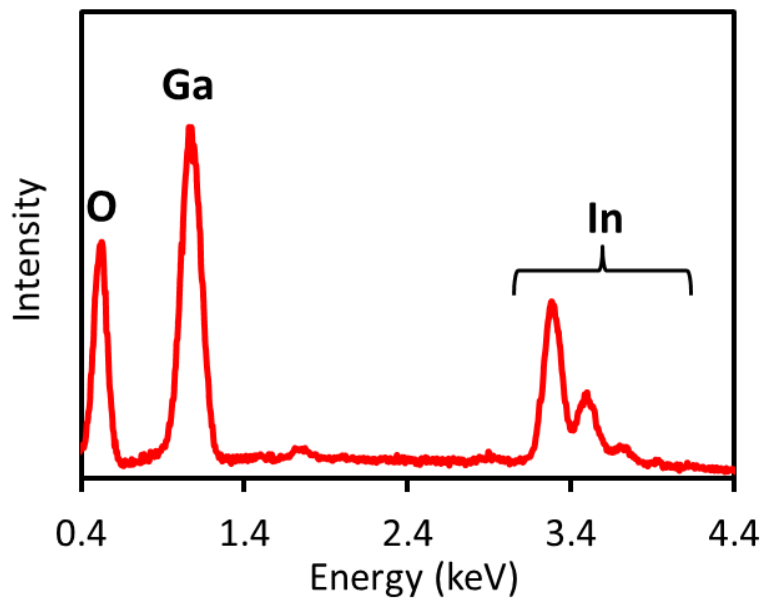

**Figure S5.** EDS spectrum for PMVEMA grafted EGaIn NPs 5 days after production.

## POMA Grafted LM NPs in HCl Acid

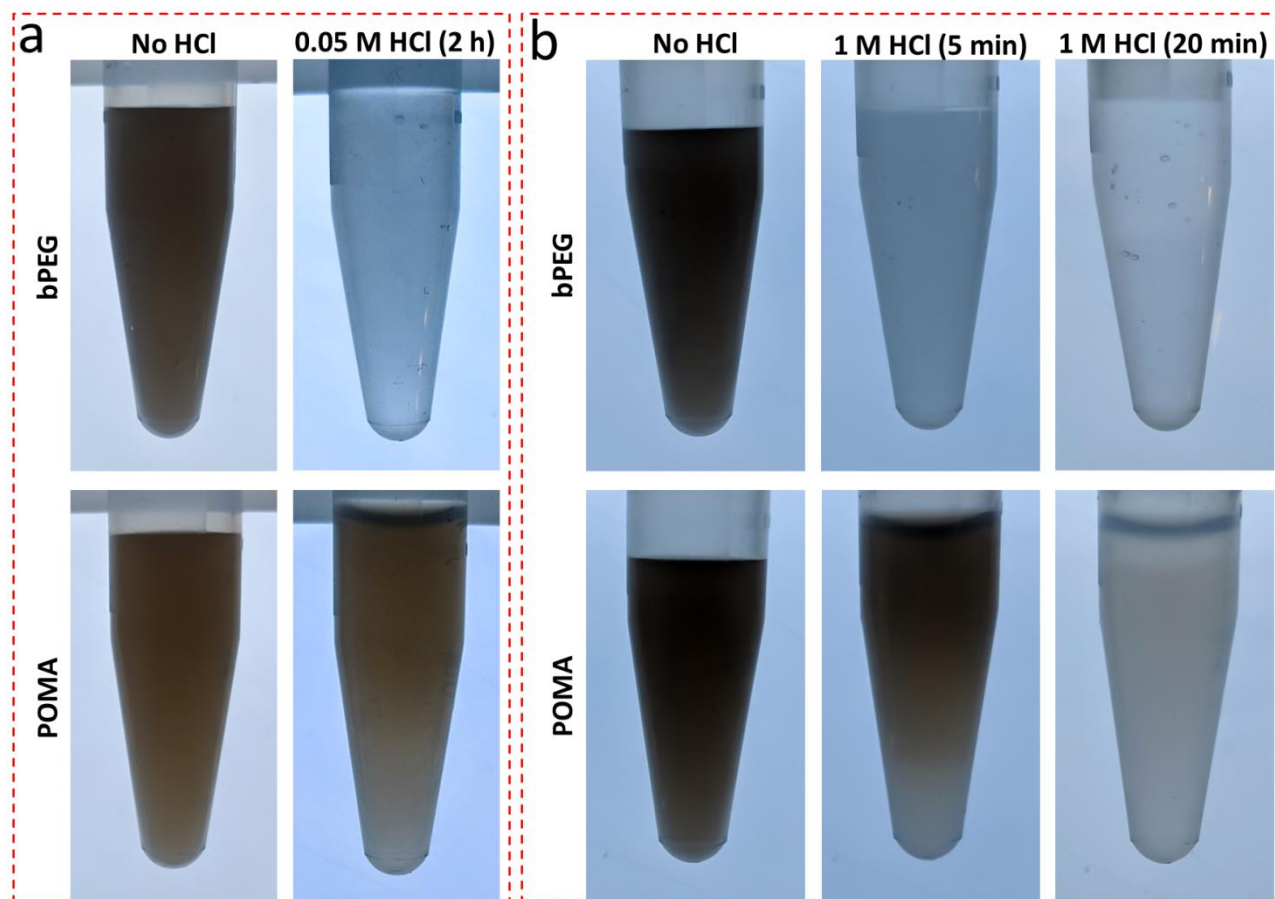

**Figure S6.** Images of bPEG and POMA grafted LM NPs before and after adding HCl solution to yield a concentration of (a) 0.05 M, and (b) 1 M. It is clear that the hydrophobic insulating layer on POMA grafted NPs can significantly enhanced the resistance of etching from strong acid.

## Grafting other NPs with POMA

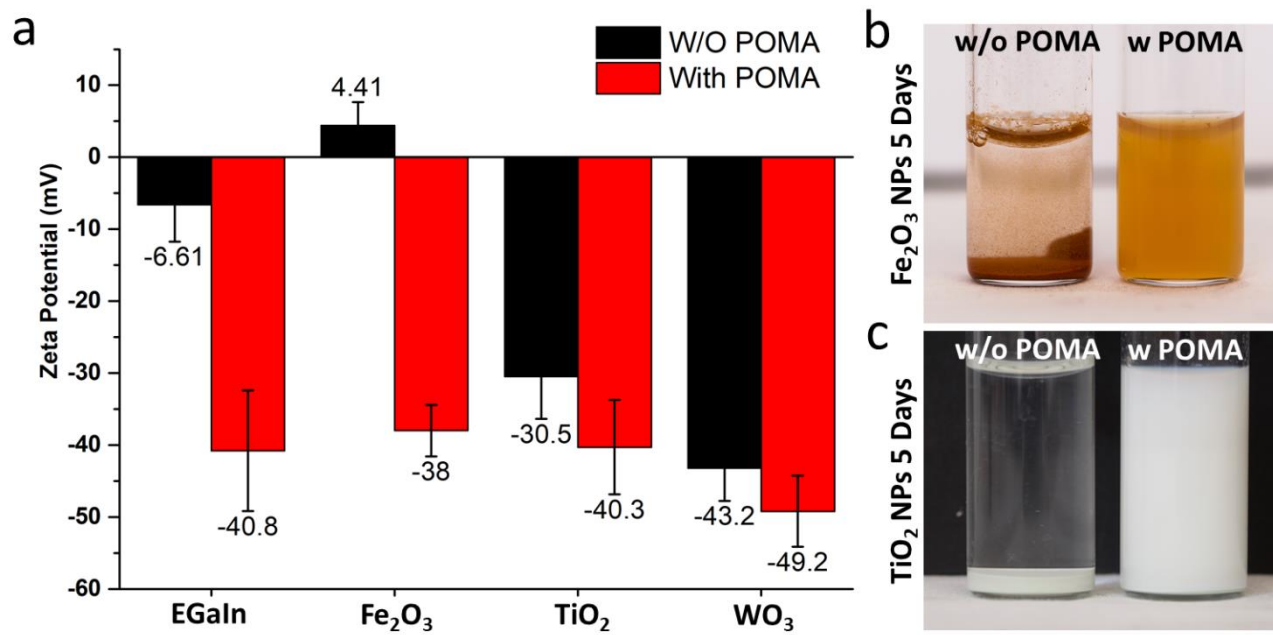

**Figure S7.** a) Zeta potential obtained for EGaIn, Fe<sub>2</sub>O<sub>3</sub>, TiO<sub>2</sub>, WO<sub>3</sub> NPs produced using sonication with or without POMA grafting. b) Fe<sub>2</sub>O<sub>3</sub> NP, and c) WO<sub>3</sub> suspension with or without POMA grafting 5 days after sonication.



## Stability of POMA grafted EGaIn NPs in 1-3× PBS buffers

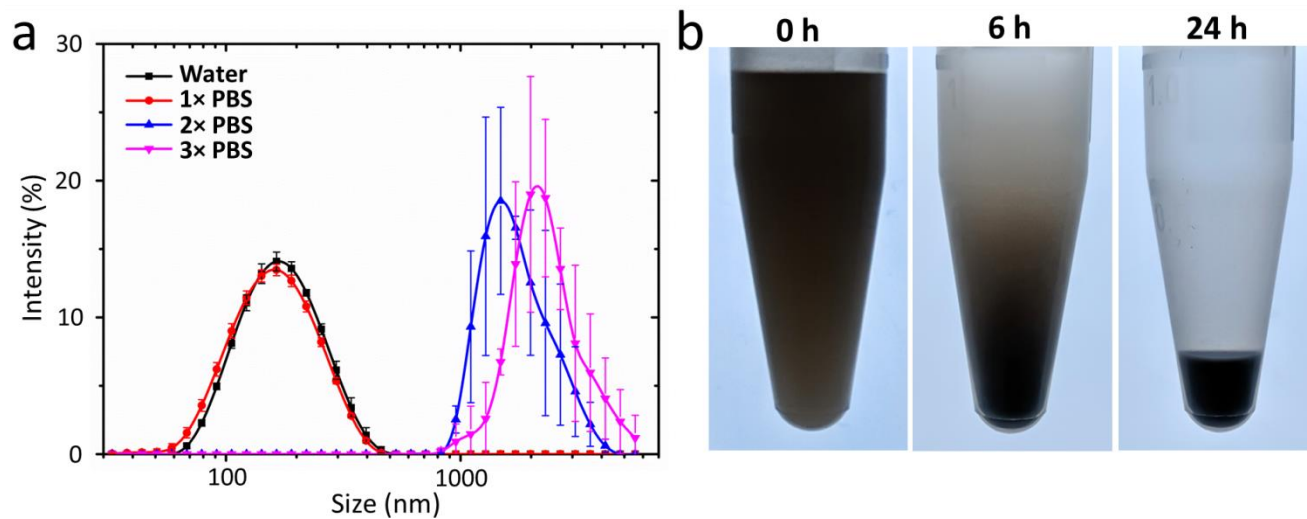

**Figure S8.** (a) Hydrodynamic size distribution of the POMA grafted EGaIn NPs within 1×, 2× and 3× PBS buffers. (b) Precipitation of LM NPs in 3× PBS buffer over a period of 24 h.

## Cytotoxicity of the POMA Grafted LM NPs

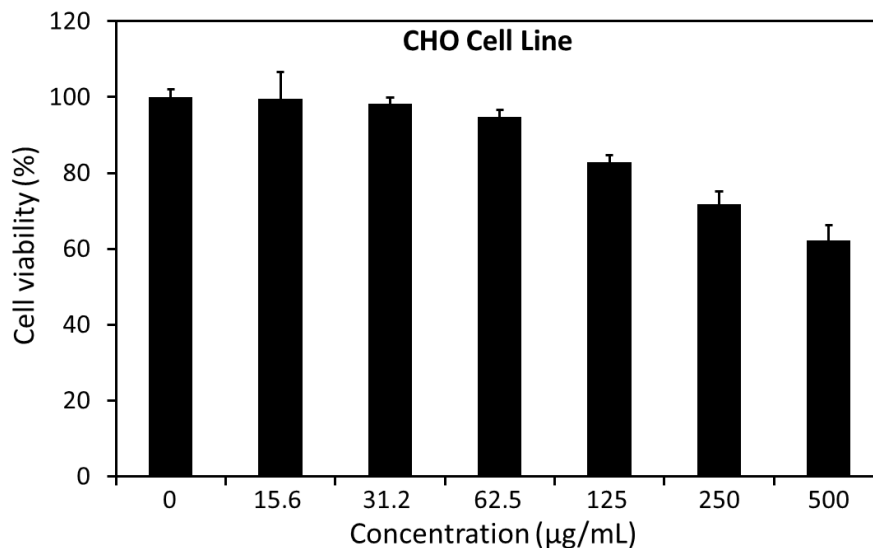

**Figure S9.** The effect of concentration for NPs grafted with POMA on the survival rates of CHO cells.

CHO cells were grown in Dulbecco's Modified Eagle Media (DMEM) culture media with 10% Fetal Bovine Serum (FBS). CHO cells ( $1 \times 10^4$  cells/well) were exposed to the LM NPs with different concentrations for 24 h in 96-well plates, with the final volume of 100  $\mu$ L. Cell culture medium was used as a control. After exposure, we removed the suspensions and incubated the cells with 10% Alamar Blue (Invitrogen) for 4 h at 37  $^{\circ}$ C. We used a microplate reader (CLARIOstar, BMG LABTECH) to read the fluorescence at 500 nm (excitation) and 530 nm (emission). Background values (10% Alamar Blue in cell culture medium) were subtracted from each well and the average fluorescent intensity of the triplicates was calculated.

### References

1. S.-Y. Tang, R. Qiao, S. Yan, D. Yuan, Q. Zhao, G. Yun, T. P. Davis, W. Li, *Small*, 2018, **14**, 1800118.
